# Supplementary material for: Noteworthy performance of La1−xCaxMnO3 perovskites in generating H2 and CO by the thermochemical splitting of H2O and CO2
Source: Royal Society of Chemistry journal article supplement (doi:10.1039/c4cp04578e), 2014-11-05
Supplement: c4cp04578e1.pdf [file c4cp04578e1.pdf]

## Supplementary information

### Noteworthy performance of $\text{La}_{1-x}\text{Ca}_x\text{MnO}_3$ perovskite oxides in generating $\text{H}_2$ and $\text{CO}$ by the thermochemical splitting of $\text{H}_2\text{O}$ and $\text{CO}_2$

Sunita Dey, B. S. Naidu, A. Govindaraj, C. N. R. Rao \*

\*E-mail: [cnrrao@jncasr.ac.in](mailto:cnrrao@jncasr.ac.in)

#### ***Experimental Section:***

All LCM compounds were prepared by solid state reactions of stoichiometric amounts of  $\text{La}_2\text{O}_3$ ,  $\text{CaCO}_3$  and  $\text{MnO}_2$ .  $\text{La}_2\text{O}_3$  was heated at  $950^\circ\text{C}$  for 12 hrs before weighing. Weighted precursors were mixed and ground well and the powders taken in a alumina crucible and fired at  $1000^\circ\text{C}$  for 2 hrs and  $1450^\circ\text{C}$  for 8hr. Intermediate grinding was carried out after every 4 hrs. For LSM compounds,  $\text{SrCO}_3$  was used as a precursor instead of  $\text{CaCO}_3$ , keeping all the other reaction procedures same. LSM 35 ( $\text{La}_{0.65}\text{Sr}_{0.35}\text{MnO}_3$ ) and  $\text{CeO}_2$  of commercial grade were purchased from Sigma-Aldrich. SmSM 50 ( $\text{Sm}_{0.50}\text{Sr}_{0.50}\text{MnO}_3$ ) was prepared by the same solid state reaction procedures using stoichiometric amounts of  $\text{Sm}_2\text{O}_3$ ,  $\text{SrCO}_3$  and  $\text{MnO}_2$ .  $\text{Sm}_2\text{O}_3$  was also preheated like  $\text{La}_2\text{O}_3$  before weighing.  $\text{La}_{1-x}\text{MnO}_3$  ( $x=0.1, 0.2$ ) and  $\text{La}_{1-x}\text{Fe}_x\text{O}_3$  ( $x=0.3$ ) was prepared by modified Pechini method. Stoichiometric amounts of nitrate precursors,  $\text{M}^x(\text{NO}_3)_x \cdot y\text{H}_2\text{O}$  were dissolved in water in the presence of excess citric acid and ethylene glycol. The gel was formed at  $80^\circ\text{C}$ , followed by drying at  $200^\circ\text{C}$  for 12 hrs. The product was heated at  $800^\circ\text{C}$  and  $1200^\circ\text{C}$  for 6 hrs each. Phase identification was performed by PXRD analysis with a Bruker D8 Advance diffractometer using  $\text{Cu K}\alpha$  radiation. The X-ray diffraction measurements were made in the range of  $20$ - $80^\circ$ . Le Bail fitting was carried out using Fullprof software in order to obtain the cell parameters of LCM 50, LSM 50, SmSM 50. FEI Nova Nanosem 600 was used to record the FESEM images and for Energy Dispersive X-Ray analysis (EDAX). X-ray photoelectron spectroscopy (XPS) was recorded with an Omicron nanotechnology spectrometer using  $\text{Mg K}\alpha$  ( $1253.6$  eV) x-ray source.

#### ***Reactivity Tests:***

Thermal reduction and  $\text{CO}_2$  splitting experiments were carried out by thermo gravimetric analysis (TGA) using a Perkin-Elmer Pyris1 instrument. About 100 mg sample was introduced in a platinum crucible and placed inside the furnace chamber. The sample was heated to  $1400^\circ\text{C}$  with a heating rate of  $20^\circ\text{C}/\text{min}$  and maintained for 45 mins under continuous Ar (99.9999% grade) flow of 40 sccm. After cooling down to  $1100^\circ\text{C}$ , 40 %  $\text{CO}_2$  mixed with Ar was injected to carry out the  $\text{CO}_2$  splitting test. Total amount of  $\text{O}_2$  evolved and  $\text{CO}$  produced was registered by calculating the change in mass. The water splitting activity of LSM 50 and LCM 50 was investigated using the experimental set up shown in Fig. 4. A known mass of the sample was kept in an alumina crucible and placed inside a tubular furnace. The sample temperature was ramped upto  $1400^\circ\text{C}$  (rate

10°C/min) and maintained for 100 min under an inert atmosphere for complete reduction. The detection and measurement of O<sub>2</sub> released were carried out by a Gas chromatograph (PerkinElmer Clarus ARNEL 580) equipped with a TCD detector. For the H<sub>2</sub> generation step, the furnace was cooled down to 1000°C and steam injected along with a continuous flow of inert gas. The sample was maintained at 1000°C for 100 min for complete oxidation. Numerical integration of molar flow rate-time curves gives the total amount of O<sub>2</sub> evolved whereas total amount of H<sub>2</sub> was calculated by water displacement method.

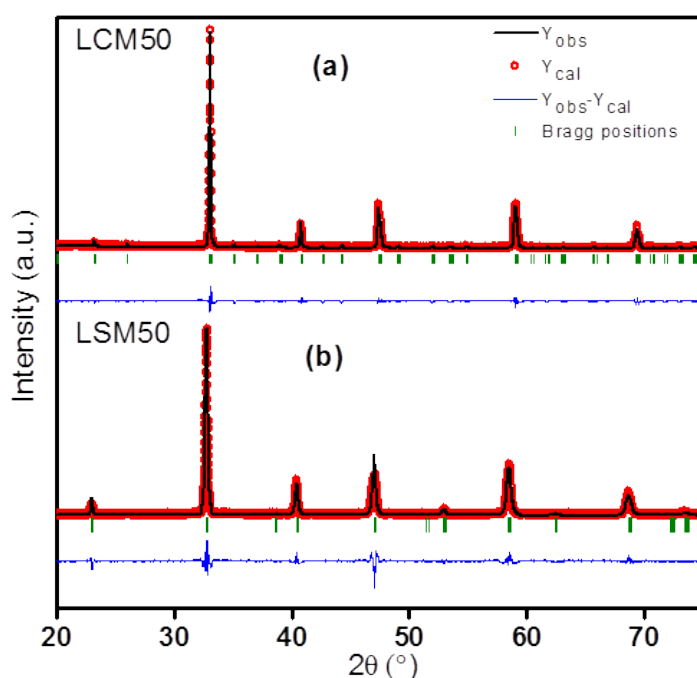

**Fig. S1** XRD patterns of (a) La<sub>0.5</sub>Ca<sub>0.5</sub>MnO<sub>3</sub> (LCM 50) and (b) La<sub>0.5</sub>Sr<sub>0.5</sub>MnO<sub>3</sub> (LSM 50). The cell parameters obtained by fitting the Powder XRD patterns of LCM50 (space group Pnma) and LSM50 (space group R-3c) are a= 5.4228(2) Å, c= 7.6424(3) Å and a= 5.4683(3) Å, c= 13.3773 (9) Å respectively.

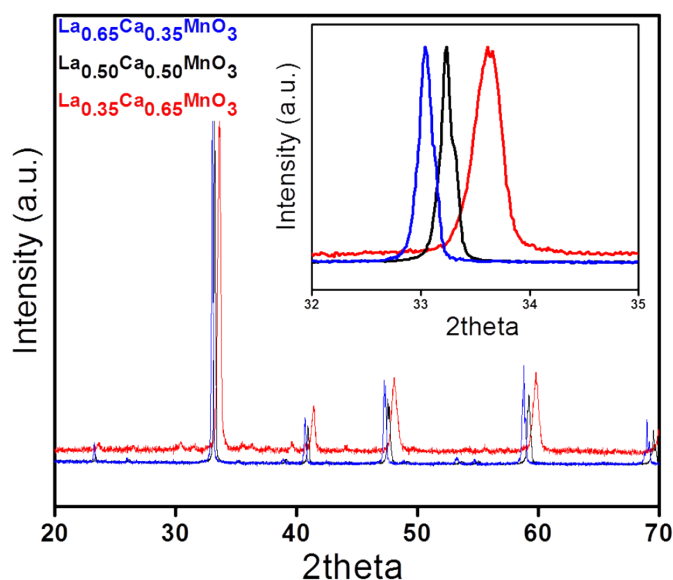

**Fig. S2** Powder XRD of  $\text{La}_{1-x}\text{Ca}_x\text{MnO}_3$  ( $x= 0.35, 0.5, 0.65$ ) perovskites phases. Inset highlights magnified view of the (200) reflections.

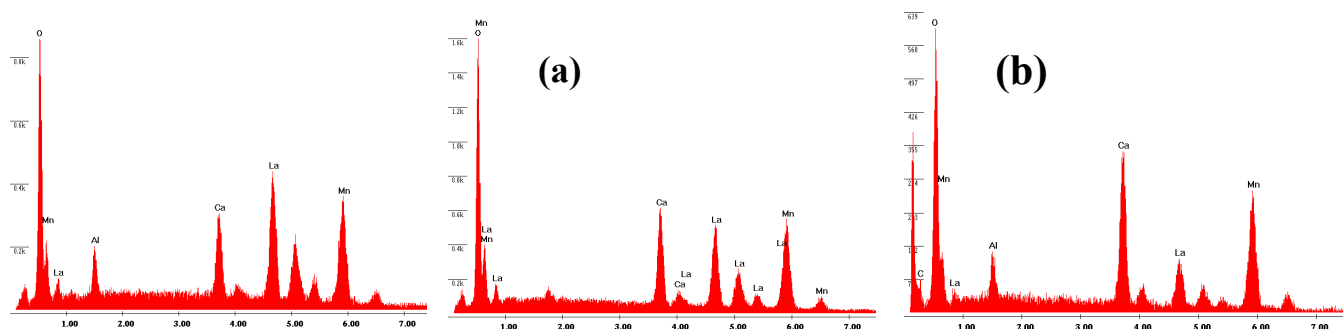

**Fig. S3** EDS (X and Y axis are

Energy in KeV and counts respectively) of (a) LCM 35, (b) LCM 50 and (c) LCM 65

**Table S1.** Atomic % of La, Ca and Mn present in LCMs as calculated from EDS analysis.

|         | LCM 35   | LCM 50   | LCM 65   |
|---------|----------|----------|----------|
| Element | Atomic % | Atomic % | Atomic % |
| O K     | 52.06    | 58.44    | 57.89    |
| Ca K    | 8.25     | 9.97     | 13.63    |
| La L    | 17.02    | 11.76    | 5.86     |
| Mn K    | 22.66    | 19.84    | 22.62    |

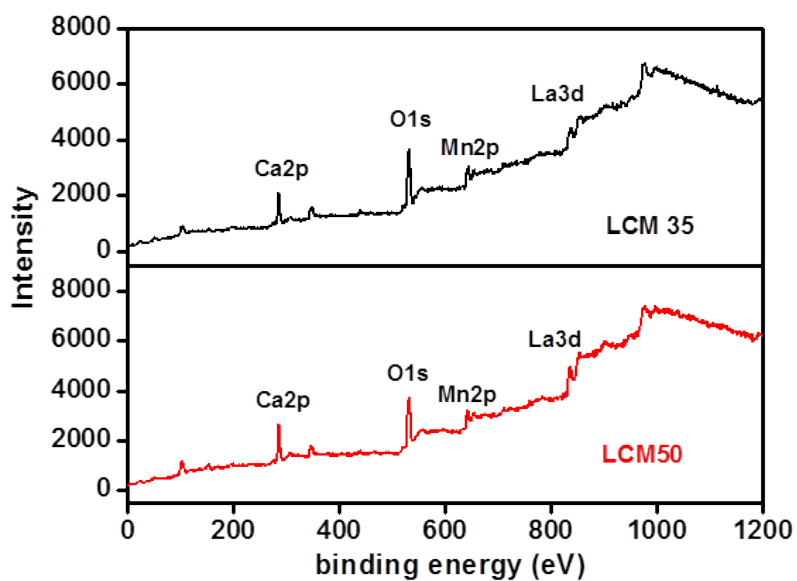

**Fig. S4** X- Ray photoelectron survey spectra of LCMs

The intensity ratio of La, Ca and Mn was calculated as,

$$R_{1,2} = \frac{I_1/A_1}{I_2/A_2} \dots\dots\dots (3)$$

Where  $I$  is the intensity obtained from the XPS spectrum after background correction and  $A$  is the atomic sensitivity factors.

**Table S2.** The cation ratio of La, Ca and Mn in LCMs as calculated from XPS survey scan.

|        | $I_{La}/A_{La}$ | $I_{Ca}/A_{Ca}$ | $I_{Mn}/A_{Mn}$ | $R_{La/Ca/Mn}$ |
|--------|-----------------|-----------------|-----------------|----------------|
| LCM 35 | 448             | 255             | 680             | 0.66/0.37/1    |
| LCM 50 | 407             | 409             | 815             | 0.5/0.5/1      |

**Table S3** Quantity of O<sub>2</sub> released and CO produced during three consecutive thermochemical cycles of LCM 50.

| Cycle No.      | Reduction temperature (°C) | O <sub>2</sub> produced (μmol/g) | CO <sub>2</sub> splitting temperature (°C) | CO produced (μmol/g) |
|----------------|----------------------------|----------------------------------|--------------------------------------------|----------------------|
| Cycle 1        | 1400                       | 309                              | 1100                                       | 631                  |
| Cycle 2        | 1400                       | 300                              | 1100                                       | 600                  |
| <b>Cycle 3</b> | <b>1350</b>                | <b>237</b>                       | <b>1000</b>                                | <b>481</b>           |

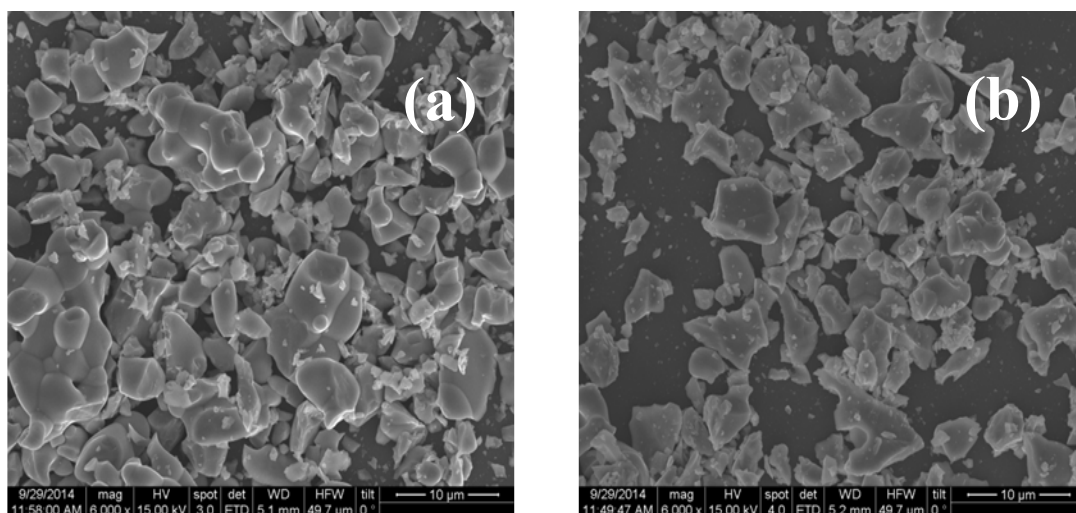

**Fig. S5** FESEM images of LCM 50 (a) before and (b) after TG analysis.

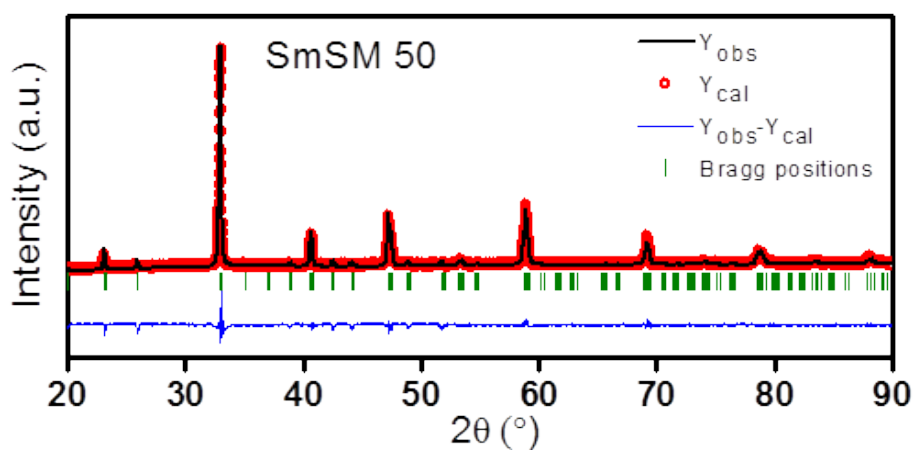

**Fig. S6** XRD patterns of  $\text{Sm}_{0.5}\text{Sr}_{0.5}\text{MnO}_3$  (SmSM 50). The cell parameters obtained by fitting the Powder XRD patterns of SmSM50 (space group Pnma) is  $a = 5.4273(3) \text{ \AA}$ ,  $b = 7.6562(4) \text{ \AA}$ ,  $c = 5.4494(2) \text{ \AA}$ .

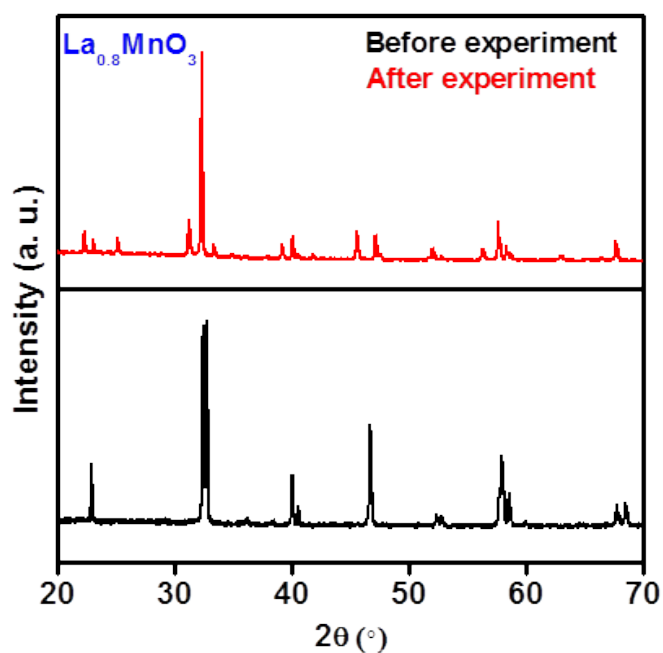

**Fig. S7** Powder XRD pattern of  $\text{La}_{0.8}\text{MnO}_3$  before and after TGA experiment.
